# Supplementary material for: Comparison of the Transcriptome Response within the Swine Tracheobronchial Lymphnode Following Infection with PRRSV, PCV-2 or IAV-S
Source: Pathogens. 2020 Feb 5;9(2):99. doi: 10.3390/pathogens9020099 (PMC7168592; doi:10.3390/pathogens9020099)
Supplement: Supplementary file 1 [file pathogens-09-00099-s001.xlsx]

## Sheet: PCV2
GeneID	log2(FC)	P-adj
ENSSSCG00000000050	1.37896	0.00010212
ENSSSCG00000028655	-1.15293	0.000136812
ENSSSCG00000005643	-1.00194	0.000175502
ENSSSCG00000031432	-0.757655	0.00163453
ENSSSCG00000011043	-1.21917	0.00163453
ENSSSCG00000023495	-0.949835	0.00589531
ENSSSCG00000034927	1.12138	0.00589531
ENSSSCG00000021472	0.777649	0.00642427
ENSSSCG00000024219	0.647981	0.00642427
ENSSSCG00000011395	0.806487	0.010358
ENSSSCG00000010959	-1.37069	0.010358
ENSSSCG00000006930	-0.629246	0.0117741
ENSSSCG00000036488	-0.903527	0.0118192
ENSSSCG00000032312	-0.700487	0.0133786
ENSSSCG00000023307	0.662552	0.0135594
ENSSSCG00000034227	1.01195	0.0143504
ENSSSCG00000023122	-0.588976	0.0172762
ENSSSCG00000036822	-0.772865	0.0172762
ENSSSCG00000021145	-0.683125	0.0172762
ENSSSCG00000034105	-0.596055	0.0172762
ENSSSCG00000015555	0.993701	0.0184439
ENSSSCG00000003914	-0.515534	0.0198794
ENSSSCG00000030371	1.18649	0.020736
ENSSSCG00000014219	-1.04985	0.0208827
ENSSSCG00000008558	-0.486311	0.0208827
ENSSSCG00000031580	0.882268	0.0257504
ENSSSCG00000011859	-0.688518	0.0273052
ENSSSCG00000038132	-0.445772	0.0273052
ENSSSCG00000034122	-0.600689	0.0273052
ENSSSCG00000005382	0.878655	0.028285
ENSSSCG00000014136	-0.945208	0.028285
ENSSSCG00000010732	-0.457123	0.028285
ENSSSCG00000038089	0.591826	0.0321984
ENSSSCG00000036501	0.642091	0.034213
ENSSSCG00000015315	0.597909	0.0344846
ENSSSCG00000025565	-0.642393	0.0344846
ENSSSCG00000006280	-1.12009	0.0344846
ENSSSCG00000033368	-0.467172	0.0344846
ENSSSCG00000038615	-0.734468	0.0344846
ENSSSCG00000010948	0.816053	0.0344846
ENSSSCG00000037158	-0.912895	0.0344846
ENSSSCG00000035772	-0.727806	0.0349573
ENSSSCG00000004421	0.813609	0.0364855
ENSSSCG00000011552	1.02413	0.0384003
ENSSSCG00000032660	-0.821531	0.0384003
ENSSSCG00000013539	0.982937	0.0384003
ENSSSCG00000013533	0.514455	0.0384003
ENSSSCG00000006775	0.678024	0.0384003
ENSSSCG00000005078	-0.762767	0.0386096
ENSSSCG00000009412	-0.553001	0.0386096
ENSSSCG00000012409	-0.920941	0.0394971
ENSSSCG00000010107	1.02962	0.0439834
ENSSSCG00000011347	-0.552326	0.0466867
ENSSSCG00000023177	0.538555	0.0466867
ENSSSCG00000039045	0.639745	0.0466867
ENSSSCG00000016961	-0.664018	0.0466867
ENSSSCG00000022507	0.720283	0.053757
ENSSSCG00000032067	0.513688	0.053757
ENSSSCG00000024655	0.729696	0.0549285
ENSSSCG00000004600	-0.536706	0.0560941
ENSSSCG00000022168	-0.674632	0.0560941
ENSSSCG00000001439	0.922402	0.0560941
ENSSSCG00000026951	-0.602285	0.0560941
ENSSSCG00000016494	-0.64697	0.0560941
ENSSSCG00000023706	-0.745999	0.0571083
ENSSSCG00000034624	0.785823	0.0604478
ENSSSCG00000002860	0.456288	0.0650234
ENSSSCG00000002740	-0.490696	0.0664726
ENSSSCG00000016019	-0.523912	0.0698703
ENSSSCG00000006088	-0.769634	0.070435
ENSSSCG00000013901	0.892834	0.0709334
ENSSSCG00000010476	-0.743992	0.0723223
ENSSSCG00000028423	-0.469495	0.0727418
ENSSSCG00000002441	-0.679168	0.0743772
ENSSSCG00000033854	0.660871	0.0743772
ENSSSCG00000032151	-0.731375	0.0790838
ENSSSCG00000022324	0.486266	0.0799164
ENSSSCG00000014075	-0.548812	0.0813903
ENSSSCG00000004544	-0.622554	0.082223
ENSSSCG00000024974	0.721672	0.082223
ENSSSCG00000012970	0.685854	0.082223
ENSSSCG00000022230	-0.661831	0.082223
ENSSSCG00000027118	0.85822	0.082223
ENSSSCG00000000916	-0.998903	0.0823603
ENSSSCG00000030460	-0.626288	0.0843386
ENSSSCG00000004385	0.659803	0.0878569
ENSSSCG00000005313	-0.500337	0.0878569
ENSSSCG00000021966	-0.685434	0.0878569
ENSSSCG00000009792	-0.737627	0.0878569
ENSSSCG00000010238	-0.586734	0.0878569
ENSSSCG00000007800	0.764145	0.0878569
ENSSSCG00000006176	0.610858	0.0878569
ENSSSCG00000024635	-0.642075	0.0878569
ENSSSCG00000040727	-0.798251	0.0901734
ENSSSCG00000006000	0.686337	0.0910104
ENSSSCG00000014569	-0.425215	0.0913759
ENSSSCG00000013647	-0.52488	0.0914778
ENSSSCG00000038594	0.672396	0.0933031
ENSSSCG00000023267	-0.495836	0.0942589
ENSSSCG00000007179	0.665891	0.0942589
ENSSSCG00000031115	-0.534217	0.0950809
ENSSSCG00000028875	-0.750682	0.0950809
ENSSSCG00000007541	-0.564577	0.09665
ENSSSCG00000015878	-0.504556	0.0977078
ENSSSCG00000022780	0.677452	0.0980019
ENSSSCG00000023191	-0.492242	0.098595
ENSSSCG00000001400	0.700522	0.0988123
ENSSSCG00000027686	0.633529	0.0988913
ENSSSCG00000000697	0.775893	0.0988913
ENSSSCG00000030421	0.410695	0.100137
ENSSSCG00000005041	-0.681469	0.101563
ENSSSCG00000022236	0.576289	0.101563
ENSSSCG00000015108	-0.496411	0.101563
ENSSSCG00000012784	0.687951	0.101563
ENSSSCG00000033721	1.08584	0.101563
ENSSSCG00000007435	0.646102	0.101563
ENSSSCG00000036039	-0.474646	0.102172
ENSSSCG00000016035	-0.593965	0.10318
ENSSSCG00000010570	0.739214	0.103458

## Sheet: PRRSV
GeneID	log2(FC)	P-adj
ENSSSCG00000033662	2.93331	3.7277e-06
ENSSSCG00000015525	1.3149	3.7277e-06
ENSSSCG00000022236	1.15228	6.77099e-06
ENSSSCG00000034927	2.93884	6.77099e-06
ENSSSCG00000039962	2.43659	2.44649e-05
ENSSSCG00000036445	-4.29855	9.20325e-05
ENSSSCG00000001456	1.28913	0.000120761
ENSSSCG00000002472	1.16373	0.000136227
ENSSSCG00000009881	2.35183	0.000138456
ENSSSCG00000023334	-4.68722	0.000138456
ENSSSCG00000005169	-1.0022	0.000140837
ENSSSCG00000000916	-2.37996	0.000140837
ENSSSCG00000014195	-4.35188	0.000180213
ENSSSCG00000004789	-4.31538	0.000246905
ENSSSCG00000031083	1.41527	0.000246905
ENSSSCG00000038080	-3.83607	0.000246905
ENSSSCG00000002245	-4.1635	0.000246905
ENSSSCG00000032067	1.20715	0.000248939
ENSSSCG00000013362	-3.51123	0.0003047
ENSSSCG00000034131	3.30283	0.000338724
ENSSSCG00000028655	-1.75947	0.000338724
ENSSSCG00000007962	1.87262	0.000420213
ENSSSCG00000023565	-3.97513	0.000440486
ENSSSCG00000031106	1.4022	0.000525509
ENSSSCG00000006862	-1.28884	0.000525509
ENSSSCG00000006280	-3.60973	0.000630246
ENSSSCG00000016113	-3.75452	0.000674411
ENSSSCG00000007675	2.35591	0.000674411
ENSSSCG00000040538	1.13167	0.000680928
ENSSSCG00000010854	1.74993	0.00069117
ENSSSCG00000003531	3.4202	0.000695014
ENSSSCG00000023437	-4.28463	0.00070424
ENSSSCG00000003914	-0.849939	0.000790611
ENSSSCG00000024219	1.08174	0.000790611
ENSSSCG00000000694	1.35239	0.000862976
ENSSSCG00000022647	1.17839	0.000908209
ENSSSCG00000012902	1.21832	0.000938682
ENSSSCG00000013533	1.12267	0.00129339
ENSSSCG00000027118	2.17167	0.00129339
ENSSSCG00000014075	-1.50912	0.0014035
ENSSSCG00000039909	1.32712	0.0014035
ENSSSCG00000038700	1.5299	0.00142117
ENSSSCG00000012566	-3.48248	0.00163151
ENSSSCG00000001989	1.34343	0.00164215
ENSSSCG00000012639	-4.08514	0.00174184
ENSSSCG00000031615	0.996339	0.00180787
ENSSSCG00000009412	-1.08413	0.00180787
ENSSSCG00000015246	1.28421	0.00191677
ENSSSCG00000036735	-4.04209	0.00203564
ENSSSCG00000010196	-4.05211	0.00207854
ENSSSCG00000016026	-4.02957	0.00207854
ENSSSCG00000002907	1.3748	0.00234488
ENSSSCG00000035901	-1.85771	0.00234488
ENSSSCG00000034122	-1.06035	0.00234488
ENSSSCG00000031869	1.80785	0.00234488
ENSSSCG00000000071	-1.41471	0.00243543
ENSSSCG00000006495	2.98726	0.00257961
ENSSSCG00000001556	2.32864	0.00257961
ENSSSCG00000011615	1.06733	0.00268274
ENSSSCG00000015074	1.11191	0.00294094
ENSSSCG00000012250	-3.93367	0.00294094
ENSSSCG00000037267	2.49923	0.0031219
ENSSSCG00000024655	1.41307	0.00335252
ENSSSCG00000031541	-2.96543	0.00338485
ENSSSCG00000001695	-3.69408	0.00338485
ENSSSCG00000040386	2.78547	0.00348163
ENSSSCG00000011336	1.31628	0.00389329
ENSSSCG00000003673	-3.33433	0.00396252
ENSSSCG00000006065	-1.20938	0.00396436
ENSSSCG00000011498	-3.31379	0.00430138
ENSSSCG00000009883	2.9743	0.00460358
ENSSSCG00000010476	-1.62071	0.0046521
ENSSSCG00000012617	-3.64678	0.0046521
ENSSSCG00000032355	1.06156	0.0046521
ENSSSCG00000017754	1.7668	0.00474462
ENSSSCG00000037032	2.36942	0.0047958
ENSSSCG00000004844	-3.79347	0.00494282
ENSSSCG00000014401	-1.43354	0.00527317
ENSSSCG00000015009	1.61659	0.00527317
ENSSSCG00000004600	-1.51587	0.00798194
ENSSSCG00000013742	1.29513	0.00798194
ENSSSCG00000010651	-1.38711	0.00798194
ENSSSCG00000015743	-3.50962	0.00798194
ENSSSCG00000038085	1.19781	0.00798194
ENSSSCG00000015140	-3.71645	0.00798194
ENSSSCG00000015315	1.33945	0.00798194
ENSSSCG00000001033	-3.48339	0.00798194
ENSSSCG00000016874	-3.44844	0.00798194
ENSSSCG00000009479	-1.3723	0.00798194
ENSSSCG00000017140	1.3266	0.00798194
ENSSSCG00000036852	1.07694	0.00798194
ENSSSCG00000040648	2.06639	0.00798194
ENSSSCG00000011745	-2.81014	0.00842204
ENSSSCG00000021472	1.13809	0.00871737
ENSSSCG00000024494	-3.6325	0.00872923
ENSSSCG00000036537	-3.44925	0.00872923
ENSSSCG00000030119	1.00832	0.00872923
ENSSSCG00000040879	-2.4372	0.00874034
ENSSSCG00000038762	-3.45906	0.00874034
ENSSSCG00000037153	3.19004	0.00874034
ENSSSCG00000016019	-1.45448	0.00874034
ENSSSCG00000023272	1.07883	0.00940079
ENSSSCG00000036822	-1.92058	0.00972969
ENSSSCG00000025355	-3.59815	0.0100813
ENSSSCG00000022225	-3.57448	0.0104627
ENSSSCG00000032660	-2.31906	0.0106021
ENSSSCG00000030632	1.29482	0.0107687
ENSSSCG00000015648	1.14193	0.011277
ENSSSCG00000034087	2.02303	0.0124182
ENSSSCG00000025796	-2.67506	0.0124182
ENSSSCG00000002411	-3.51462	0.0124799
ENSSSCG00000016732	1.12066	0.0124799
ENSSSCG00000025686	-3.51922	0.0126419
ENSSSCG00000027403	-3.50257	0.012794
ENSSSCG00000039521	-3.57728	0.012794
ENSSSCG00000009557	1.26863	0.012794
ENSSSCG00000002715	-1.26707	0.0132701
ENSSSCG00000015879	-1.09747	0.0132701
ENSSSCG00000006930	-0.817735	0.0132701
ENSSSCG00000005320	-3.48218	0.0137838
ENSSSCG00000036679	-3.48623	0.0137838
ENSSSCG00000003783	-3.48649	0.013844
ENSSSCG00000013406	-2.67114	0.013844
ENSSSCG00000030421	0.856302	0.013844
ENSSSCG00000003584	1.02635	0.0143373
ENSSSCG00000025286	-3.29971	0.0145228
ENSSSCG00000010187	-2.83489	0.0146733
ENSSSCG00000003876	-3.20995	0.0148927
ENSSSCG00000036063	-3.45271	0.0149307
ENSSSCG00000023177	0.931412	0.0152721
ENSSSCG00000016990	0.838296	0.0152721
ENSSSCG00000011763	-3.42874	0.0157321
ENSSSCG00000005444	-1.11502	0.0162156
ENSSSCG00000021802	-1.09199	0.0167549
ENSSSCG00000032578	-3.25232	0.0167549
ENSSSCG00000008581	-2.32487	0.0167549
ENSSSCG00000034340	-3.40437	0.0169795
ENSSSCG00000005652	-3.39833	0.0169795
ENSSSCG00000033232	-2.7556	0.0181455
ENSSSCG00000038474	2.62717	0.0184405
ENSSSCG00000005983	-2.15612	0.0184405
ENSSSCG00000033524	-3.38243	0.0185579
ENSSSCG00000006466	1.58666	0.0187182
ENSSSCG00000024881	-3.37622	0.0187217
ENSSSCG00000039324	0.915696	0.0187217
ENSSSCG00000016057	1.40646	0.0187792
ENSSSCG00000003485	1.23599	0.0188841
ENSSSCG00000011870	-3.36394	0.0191756
ENSSSCG00000023377	0.996729	0.0191756
ENSSSCG00000016164	-3.24748	0.0191756
ENSSSCG00000017024	-1.33666	0.0191756
ENSSSCG00000013874	1.27636	0.0193394
ENSSSCG00000028423	-0.923905	0.0199723
ENSSSCG00000003195	1.10989	0.0202467
ENSSSCG00000000602	-2.72447	0.0202943
ENSSSCG00000015284	-3.08809	0.0213899
ENSSSCG00000022940	-3.31595	0.0217046
ENSSSCG00000009276	-3.34067	0.0218412
ENSSSCG00000010959	-2.81893	0.0220671
ENSSSCG00000032726	-3.03534	0.0224716
ENSSSCG00000029708	1.59628	0.022555
ENSSSCG00000016035	-2.0297	0.022555
ENSSSCG00000023738	-3.29576	0.0226314
ENSSSCG00000026994	-3.28887	0.0228753
ENSSSCG00000029034	0.774925	0.0229082
ENSSSCG00000007466	-3.31974	0.0230833
ENSSSCG00000038549	-1.40282	0.0233132
ENSSSCG00000017713	-3.27094	0.0233132
ENSSSCG00000033329	-3.0376	0.0234333
ENSSSCG00000010569	-3.03156	0.023481
ENSSSCG00000005208	-3.25997	0.0239936
ENSSSCG00000032059	1.11041	0.0239936
ENSSSCG00000009511	1.40925	0.0240162
ENSSSCG00000004353	-3.03211	0.0243609
ENSSSCG00000038643	-3.11527	0.0243609
ENSSSCG00000012649	-3.12683	0.0246631
ENSSSCG00000037030	-3.25084	0.025206
ENSSSCG00000011695	-2.67895	0.025206
ENSSSCG00000008690	1.40598	0.025206
ENSSSCG00000009090	-3.1011	0.025206
ENSSSCG00000034984	0.890444	0.025206
ENSSSCG00000033036	-3.25107	0.025206
ENSSSCG00000016911	-3.15934	0.025206
ENSSSCG00000006385	0.886025	0.0263295
ENSSSCG00000016836	-3.21908	0.0267711
ENSSSCG00000015798	-3.22013	0.0271439
ENSSSCG00000039060	-3.21628	0.0271439
ENSSSCG00000017817	-3.24967	0.0271439
ENSSSCG00000008069	-1.36595	0.0273802
ENSSSCG00000012001	-3.20552	0.0274967
ENSSSCG00000006522	1.18211	0.0274967
ENSSSCG00000010849	-3.21284	0.0274967
ENSSSCG00000010509	-3.07249	0.0276917
ENSSSCG00000006108	-3.18943	0.0288249
ENSSSCG00000013286	-1.10268	0.0289962
ENSSSCG00000003016	1.00104	0.0294651
ENSSSCG00000022687	1.06549	0.0294651
ENSSSCG00000010107	1.90348	0.02951
ENSSSCG00000005041	-1.90638	0.0298443
ENSSSCG00000039838	-1.05772	0.0300454
ENSSSCG00000004544	-1.10302	0.030872
ENSSSCG00000015430	-3.15443	0.030872
ENSSSCG00000030209	0.874651	0.0308833
ENSSSCG00000036136	1.9131	0.0309311
ENSSSCG00000008048	1.03568	0.0309311
ENSSSCG00000028712	1.16093	0.0312035
ENSSSCG00000017672	-3.14525	0.031358
ENSSSCG00000024663	-3.15421	0.0321557
ENSSSCG00000031169	-0.802798	0.0321557
ENSSSCG00000039074	-3.0428	0.0321557
ENSSSCG00000030211	-3.14258	0.0321557
ENSSSCG00000016453	-2.82815	0.0321989
ENSSSCG00000035578	0.955485	0.0330873
ENSSSCG00000006187	2.81956	0.0330873
ENSSSCG00000004489	-2.92181	0.0334314
ENSSSCG00000027746	-0.941454	0.0334314
ENSSSCG00000036224	1.41975	0.0337234
ENSSSCG00000008386	-3.13077	0.0343324
ENSSSCG00000008398	-3.122	0.0343324
ENSSSCG00000037547	-3.10849	0.0343324
ENSSSCG00000038384	1.39719	0.0343324
ENSSSCG00000014211	-2.21545	0.0343565
ENSSSCG00000039816	-3.13563	0.0343565
ENSSSCG00000033788	1.07929	0.0343565
ENSSSCG00000024635	-1.998	0.034713
ENSSSCG00000035037	-3.10282	0.034721
ENSSSCG00000040977	2.24988	0.034721
ENSSSCG00000039321	1.17031	0.0350575
ENSSSCG00000010246	-2.9812	0.0355032
ENSSSCG00000003168	1.04058	0.0357211
ENSSSCG00000035770	1.1392	0.0359594
ENSSSCG00000021966	-1.29143	0.0367313
ENSSSCG00000011782	-2.84488	0.0369645
ENSSSCG00000015602	-3.06755	0.0369645
ENSSSCG00000016529	-3.075	0.0369645
ENSSSCG00000032478	-2.96164	0.0372212
ENSSSCG00000037132	-3.06876	0.0387907
ENSSSCG00000013857	-3.05954	0.0393897
ENSSSCG00000037706	-3.05214	0.040998
ENSSSCG00000010738	-2.66948	0.0410234
ENSSSCG00000032550	-3.08242	0.0411074
ENSSSCG00000025119	-3.0896	0.0411074
ENSSSCG00000023716	-2.39772	0.0411074
ENSSSCG00000006894	-1.17328	0.0411074
ENSSSCG00000017205	1.21612	0.0411074
ENSSSCG00000017422	-3.04843	0.0411074
ENSSSCG00000026898	-3.0552	0.0411902
ENSSSCG00000007963	2.16303	0.0411902
ENSSSCG00000006578	1.31613	0.0411902
ENSSSCG00000005078	-2.37535	0.0413908
ENSSSCG00000030204	-1.59315	0.0413908
ENSSSCG00000024912	-2.59841	0.0420698
ENSSSCG00000011630	-2.18538	0.0420698
ENSSSCG00000024623	1.02218	0.0420698
ENSSSCG00000036039	-1.17015	0.0420698
ENSSSCG00000008058	1.8555	0.0420698
ENSSSCG00000022324	0.8262	0.0422537
ENSSSCG00000016535	-3.00424	0.0432108
ENSSSCG00000004412	-3.0051	0.0434442
ENSSSCG00000040570	-3.01816	0.0434442
ENSSSCG00000004480	2.01015	0.0437372
ENSSSCG00000017421	-2.58565	0.0437372
ENSSSCG00000032312	-1.33853	0.0442371
ENSSSCG00000020790	-2.8748	0.0442371
ENSSSCG00000027718	-3.00914	0.0442371
ENSSSCG00000030548	2.87658	0.0442371
ENSSSCG00000020665	1.09923	0.0448106
ENSSSCG00000009836	-2.87924	0.0459689
ENSSSCG00000024152	1.37527	0.0459689
ENSSSCG00000030637	2.63277	0.0467612
ENSSSCG00000009047	-1.15704	0.0467612
ENSSSCG00000001428	2.23839	0.0478795
ENSSSCG00000027017	-2.95903	0.0484448
ENSSSCG00000038912	1.90915	0.0484448
ENSSSCG00000012926	-2.96035	0.0484448
ENSSSCG00000015237	2.71441	0.0484448
ENSSSCG00000021560	1.18786	0.0484448
ENSSSCG00000033854	1.33681	0.0484448
ENSSSCG00000033000	-2.95224	0.0488058
ENSSSCG00000037264	0.665381	0.0488058
ENSSSCG00000032288	-2.96995	0.0488058
ENSSSCG00000008193	-2.67361	0.0488058
ENSSSCG00000006089	1.51671	0.0488058
ENSSSCG00000036286	-2.97258	0.0488058
ENSSSCG00000005349	2.5526	0.048943
ENSSSCG00000039861	2.13896	0.0489934
ENSSSCG00000037655	-2.83406	0.0489934
ENSSSCG00000038031	-2.61044	0.0489934
ENSSSCG00000012686	-2.94669	0.0493829
ENSSSCG00000001822	-2.69011	0.0498011
ENSSSCG00000003035	0.969159	0.0524809
ENSSSCG00000010002	1.04409	0.0524809
ENSSSCG00000022092	-2.3976	0.0524809
ENSSSCG00000002414	-2.91836	0.0524809
ENSSSCG00000023886	-2.94132	0.0525332
ENSSSCG00000031221	-2.91874	0.0525332
ENSSSCG00000007637	-2.6765	0.0527819
ENSSSCG00000038323	-2.93193	0.0529401
ENSSSCG00000002724	-1.26151	0.0529423
ENSSSCG00000002963	1.44789	0.0529423
ENSSSCG00000016156	-2.82129	0.0529423
ENSSSCG00000017801	1.25601	0.0529423
ENSSSCG00000009851	-2.94835	0.0529945
ENSSSCG00000013596	0.643005	0.0531442
ENSSSCG00000006625	-2.91325	0.0535638
ENSSSCG00000017051	0.826491	0.053776
ENSSSCG00000040449	-2.91479	0.053776
ENSSSCG00000012904	2.1689	0.0539991
ENSSSCG00000004750	1.122	0.0548292
ENSSSCG00000017555	-2.91259	0.0548292
ENSSSCG00000017308	-2.89724	0.0549815
ENSSSCG00000007179	1.14568	0.0551381
ENSSSCG00000004244	-2.78384	0.0553137
ENSSSCG00000006968	-2.88327	0.0553777
ENSSSCG00000004237	-0.99885	0.0554177
ENSSSCG00000010226	-1.38412	0.0557741
ENSSSCG00000013597	0.953106	0.0559644
ENSSSCG00000036503	-2.88661	0.057605
ENSSSCG00000029774	-2.33531	0.0578268
ENSSSCG00000028275	1.21749	0.0589584
ENSSSCG00000005663	-2.75813	0.058982
ENSSSCG00000022256	1.20403	0.0596785
ENSSSCG00000012324	-2.85618	0.0600919
ENSSSCG00000015953	-2.87217	0.0602429
ENSSSCG00000034708	2.18053	0.0602429
ENSSSCG00000017645	-2.62518	0.0602429
ENSSSCG00000035746	-2.48877	0.0607729
ENSSSCG00000039045	0.874594	0.0608904
ENSSSCG00000033337	1.0923	0.0609005
ENSSSCG00000004334	-2.83265	0.0630627
ENSSSCG00000015357	-2.72871	0.0642424
ENSSSCG00000011916	-2.75621	0.0646863
ENSSSCG00000016042	2.0289	0.0646863
ENSSSCG00000004701	-2.83426	0.0648256
ENSSSCG00000032407	-2.59841	0.0648256
ENSSSCG00000012967	-2.74419	0.0648256
ENSSSCG00000015013	-2.2835	0.0648256
ENSSSCG00000008169	-2.83992	0.0648256
ENSSSCG00000033332	1.51301	0.0648256
ENSSSCG00000027157	-1.14748	0.064889
ENSSSCG00000009704	-2.15571	0.0649263
ENSSSCG00000011689	-2.76534	0.0649391
ENSSSCG00000004791	-2.70985	0.0653534
ENSSSCG00000009536	-2.70985	0.0653534
ENSSSCG00000032620	-2.81316	0.0656517
ENSSSCG00000031459	-2.83814	0.0660311
ENSSSCG00000000072	-2.71984	0.0660567
ENSSSCG00000012743	-2.8021	0.0662111
ENSSSCG00000006088	-2.24244	0.0672685
ENSSSCG00000002645	0.870046	0.0675482
ENSSSCG00000028504	1.11146	0.0688348
ENSSSCG00000003413	-2.80294	0.0689321
ENSSSCG00000011867	-1.25703	0.0698517
ENSSSCG00000015818	-2.69835	0.0698517
ENSSSCG00000005607	-2.78411	0.069896
ENSSSCG00000023495	-1.74783	0.069896
ENSSSCG00000013084	-2.78271	0.069896
ENSSSCG00000016916	-1.34552	0.069896
ENSSSCG00000012164	2.78479	0.0703319
ENSSSCG00000004658	-2.78291	0.0715184
ENSSSCG00000021934	0.88734	0.0715184
ENSSSCG00000010027	1.51909	0.07156
ENSSSCG00000009644	-2.49287	0.0717318
ENSSSCG00000029478	-2.76449	0.0717318
ENSSSCG00000029944	-1.49636	0.0717318
ENSSSCG00000025777	-2.67718	0.0723073
ENSSSCG00000010585	1.50871	0.0723073
ENSSSCG00000021229	0.974118	0.0723073
ENSSSCG00000038947	1.01172	0.0728515
ENSSSCG00000005267	-0.82856	0.0729266
ENSSSCG00000035772	-1.76165	0.0739706
ENSSSCG00000008000	-2.76227	0.0739706
ENSSSCG00000008433	-2.56491	0.0739706
ENSSSCG00000001691	-2.65092	0.0739706
ENSSSCG00000004123	-2.65831	0.0752161
ENSSSCG00000022507	1.70164	0.0752161
ENSSSCG00000038859	-2.74993	0.0752161
ENSSSCG00000006110	-2.68058	0.0752161
ENSSSCG00000038374	-2.74724	0.0752161
ENSSSCG00000008188	-2.74374	0.0752289
ENSSSCG00000007521	-2.74323	0.0752289
ENSSSCG00000011284	-2.46312	0.0757797
ENSSSCG00000038534	-2.76229	0.0762856
ENSSSCG00000014280	-2.65951	0.076737
ENSSSCG00000000663	-2.29729	0.076737
ENSSSCG00000005901	0.95666	0.0768931
ENSSSCG00000015840	-2.64566	0.0769463
ENSSSCG00000003583	-2.73534	0.0771302
ENSSSCG00000012396	-2.67473	0.0771302
ENSSSCG00000034624	1.26476	0.0775512
ENSSSCG00000026571	-2.27352	0.0776173
ENSSSCG00000000973	1.88272	0.0776173
ENSSSCG00000025139	-2.72827	0.0778164
ENSSSCG00000017727	-2.72808	0.0778164
ENSSSCG00000009584	-0.943099	0.0779498
ENSSSCG00000001701	-2.13583	0.0781466
ENSSSCG00000032710	1.01772	0.0781548
ENSSSCG00000005313	-0.872914	0.0785627
ENSSSCG00000005373	-2.27711	0.0785627
ENSSSCG00000017943	1.74377	0.0785627
ENSSSCG00000017578	-2.73343	0.0786302
ENSSSCG00000035284	-1.48142	0.078768
ENSSSCG00000004314	-2.62873	0.0792784
ENSSSCG00000027571	-2.51046	0.0792784
ENSSSCG00000001426	2.69204	0.0792784
ENSSSCG00000028132	-2.62104	0.0792784
ENSSSCG00000017152	1.14875	0.0792784
ENSSSCG00000028572	-2.7529	0.0797423
ENSSSCG00000028258	-2.70181	0.0800155
ENSSSCG00000002426	-1.39803	0.0800155
ENSSSCG00000010189	-2.46733	0.0801053
ENSSSCG00000035027	-2.69715	0.0805247
ENSSSCG00000006153	1.08412	0.0805247
ENSSSCG00000002633	-2.68985	0.0811072
ENSSSCG00000003104	-2.7353	0.081353
ENSSSCG00000014812	1.84179	0.081353
ENSSSCG00000036499	-2.70199	0.081353
ENSSSCG00000000884	-2.69134	0.081353
ENSSSCG00000017494	-1.89522	0.081353
ENSSSCG00000004178	-2.7005	0.0814033
ENSSSCG00000010204	-2.69553	0.0814033
ENSSSCG00000001439	1.64489	0.0814033
ENSSSCG00000033020	2.50718	0.0814033
ENSSSCG00000002296	-2.72644	0.0814329
ENSSSCG00000016720	2.66192	0.0818572
ENSSSCG00000008510	-2.63083	0.0820925
ENSSSCG00000028856	1.12959	0.0821311
ENSSSCG00000003888	-2.68565	0.0821311
ENSSSCG00000040087	-2.3824	0.0821311
ENSSSCG00000012329	2.54432	0.0821311
ENSSSCG00000036156	-2.26279	0.0822774
ENSSSCG00000039191	-1.05702	0.0824935
ENSSSCG00000005638	-2.59177	0.0836115
ENSSSCG00000011930	-2.6711	0.0836115
ENSSSCG00000025133	2.16513	0.0836115
ENSSSCG00000013392	-2.67948	0.0836115
ENSSSCG00000010481	-2.66634	0.0836115
ENSSSCG00000005969	-2.66364	0.084056
ENSSSCG00000014149	-2.47984	0.0848008
ENSSSCG00000006035	-2.67671	0.0848008
ENSSSCG00000006970	-2.68102	0.0848008
ENSSSCG00000034841	-0.551088	0.0850815
ENSSSCG00000016957	-2.66396	0.0852161
ENSSSCG00000010396	-2.66602	0.0852411
ENSSSCG00000033189	-1.21563	0.0857175
ENSSSCG00000008854	-2.49236	0.0857175
ENSSSCG00000004497	-2.28246	0.0857787
ENSSSCG00000028674	-1.16155	0.0857787
ENSSSCG00000022168	-1.21144	0.0858363
ENSSSCG00000039327	0.841287	0.0858363
ENSSSCG00000025298	-2.66153	0.0861159
ENSSSCG00000009357	-2.35766	0.0861159
ENSSSCG00000011485	-2.66901	0.0861438
ENSSSCG00000035795	-2.56982	0.0861438
ENSSSCG00000032377	-1.86444	0.0863543
ENSSSCG00000008725	-2.69012	0.0868942
ENSSSCG00000024692	-2.65523	0.0868942
ENSSSCG00000036501	0.989855	0.0874376
ENSSSCG00000031492	0.726758	0.0879123
ENSSSCG00000028397	-2.64667	0.0879123
ENSSSCG00000015897	-1.10806	0.0883049
ENSSSCG00000016031	-2.62943	0.0883049
ENSSSCG00000031717	-2.35685	0.0883049
ENSSSCG00000038417	0.826801	0.0883049
ENSSSCG00000010753	-2.54944	0.0892046
ENSSSCG00000004890	-2.64368	0.0902453
ENSSSCG00000005667	1.50494	0.0902453
ENSSSCG00000003885	-0.693159	0.0902453
ENSSSCG00000014365	-2.53687	0.0902453
ENSSSCG00000001052	1.4937	0.0902453
ENSSSCG00000011330	0.984259	0.0904856
ENSSSCG00000017920	0.890912	0.0911097
ENSSSCG00000015387	-0.699514	0.0911411
ENSSSCG00000023595	0.726423	0.0914241
ENSSSCG00000033262	1.1321	0.0914241
ENSSSCG00000025839	-2.50696	0.0919262
ENSSSCG00000003872	-2.44429	0.0921717
ENSSSCG00000005024	0.791165	0.0923926
ENSSSCG00000016402	-2.53546	0.0923926
ENSSSCG00000029198	1.1461	0.0923926
ENSSSCG00000032151	-1.76018	0.0923926
ENSSSCG00000037355	-2.26452	0.0923926
ENSSSCG00000012703	-1.12117	0.0923926
ENSSSCG00000031224	2.19542	0.0923926
ENSSSCG00000009489	-2.6117	0.0923926
ENSSSCG00000027826	0.638964	0.0923926
ENSSSCG00000009713	-2.63615	0.092433
ENSSSCG00000031147	-0.582157	0.0927527
ENSSSCG00000014238	-2.6079	0.0927527
ENSSSCG00000006678	1.77179	0.0938276
ENSSSCG00000029113	-2.5089	0.0938276
ENSSSCG00000022464	-2.60314	0.0938276
ENSSSCG00000022145	-0.713391	0.0940131
ENSSSCG00000017191	-2.33533	0.0940131
ENSSSCG00000030497	-2.50899	0.0942594
ENSSSCG00000033919	-2.39726	0.0946761
ENSSSCG00000003637	-2.60931	0.0948131
ENSSSCG00000022790	1.0347	0.0948199
ENSSSCG00000037263	-2.58856	0.0948338
ENSSSCG00000005643	-1.50696	0.0948936
ENSSSCG00000000433	-0.707029	0.0948936
ENSSSCG00000003402	-2.59047	0.094976
ENSSSCG00000023829	-2.60224	0.094976
ENSSSCG00000000910	-2.6179	0.094976
ENSSSCG00000009945	-2.58356	0.0963168
ENSSSCG00000012063	0.966319	0.0963194
ENSSSCG00000009492	-2.29204	0.0967672
ENSSSCG00000013115	0.718529	0.0972873
ENSSSCG00000004156	-2.50153	0.0976502
ENSSSCG00000026180	-2.58282	0.0976502
ENSSSCG00000011045	1.21206	0.0976502
ENSSSCG00000030423	0.918964	0.0977451
ENSSSCG00000008344	-2.49581	0.0977451
ENSSSCG00000004110	-2.61059	0.0978619
ENSSSCG00000027357	2.29733	0.0978619
ENSSSCG00000028516	-2.57029	0.0980652
ENSSSCG00000034645	-2.57528	0.0985339
ENSSSCG00000011263	-1.74714	0.0987382
ENSSSCG00000010133	-2.53947	0.0988131
ENSSSCG00000029199	1.46214	0.0989508
ENSSSCG00000037821	-2.18086	0.0991564
ENSSSCG00000012481	-1.36484	0.0991564
ENSSSCG00000007147	-2.59223	0.0991564
ENSSSCG00000003964	0.769948	0.100863
ENSSSCG00000014569	-0.585883	0.100863
ENSSSCG00000016191	-2.47274	0.103223
ENSSSCG00000028517	-2.54206	0.103223
ENSSSCG00000003183	1.15072	0.103407
ENSSSCG00000035945	1.60782	0.103997
ENSSSCG00000011253	-2.4805	0.10416
ENSSSCG00000013295	-1.84178	0.10416
ENSSSCG00000009741	-2.54185	0.10416
ENSSSCG00000012141	-2.54897	0.104296
ENSSSCG00000013893	-2.54476	0.10432

## Sheet: IAV-S
GeneID	log2(FC)	P-adj
ENSSSCG00000040236	5.69438	3.88803e-12
ENSSSCG00000020945	-3.60259	1.59419e-10
ENSSSCG00000033662	2.71991	2.5187e-07
ENSSSCG00000040977	2.89512	3.6225e-07
ENSSSCG00000002703	2.07074	1.02957e-06
ENSSSCG00000016075	2.3965	2.9424e-06
ENSSSCG00000001556	2.00343	5.04215e-06
ENSSSCG00000016658	-3.6625	3.68149e-05
ENSSSCG00000015846	-3.47468	0.000109989
ENSSSCG00000016714	2.83204	0.000169372
ENSSSCG00000005349	2.93486	0.000305273
ENSSSCG00000037793	3.15316	0.000340171
ENSSSCG00000027118	2.53467	0.000491058
ENSSSCG00000003885	-1.53985	0.00101553
ENSSSCG00000034927	2.12742	0.00101553
ENSSSCG00000001435	-2.83165	0.00101553
ENSSSCG00000009047	-1.66909	0.00148716
ENSSSCG00000040386	2.53523	0.0015472
ENSSSCG00000024152	1.60387	0.0015472
ENSSSCG00000031169	-1.0475	0.00200858
ENSSSCG00000003524	2.85141	0.00233218
ENSSSCG00000022145	-1.15252	0.00245273
ENSSSCG00000007962	1.78638	0.0025325
ENSSSCG00000005667	1.64561	0.00303925
ENSSSCG00000009904	-1.29256	0.00303925
ENSSSCG00000036679	-3.28534	0.00606343
ENSSSCG00000011045	1.46568	0.00606343
ENSSSCG00000016821	2.14692	0.00667937
ENSSSCG00000026951	-1.10657	0.00672803
ENSSSCG00000015326	-1.79251	0.00796613
ENSSSCG00000004421	1.72727	0.00807687
ENSSSCG00000016718	-3.20665	0.00883096
ENSSSCG00000004192	-1.54363	0.00906657
ENSSSCG00000001439	1.74713	0.00947765
ENSSSCG00000018041	-2.72619	0.00947765
ENSSSCG00000002444	-1.4465	0.00995976
ENSSSCG00000009849	1.53834	0.0110823
ENSSSCG00000015009	1.56856	0.0117218
ENSSSCG00000021802	-1.0926	0.0121772
ENSSSCG00000001455	-3.08523	0.0134853
ENSSSCG00000039137	2.02379	0.0134947
ENSSSCG00000030632	1.11815	0.0136819
ENSSSCG00000040538	0.818458	0.0137235
ENSSSCG00000027342	-1.16311	0.0137817
ENSSSCG00000029261	3.06905	0.0149583
ENSSSCG00000007503	-2.85515	0.0158178
ENSSSCG00000012904	2.14227	0.016346
ENSSSCG00000024385	2.14131	0.0220852
ENSSSCG00000017421	-2.46044	0.0221754
ENSSSCG00000030255	-1.83308	0.0225855
ENSSSCG00000027723	2.15468	0.0231362
ENSSSCG00000008924	2.2469	0.0231362
ENSSSCG00000017504	1.68131	0.0231362
ENSSSCG00000032698	2.66764	0.0238604
ENSSSCG00000010863	-2.83175	0.0238604
ENSSSCG00000005444	-0.97528	0.0263887
ENSSSCG00000031083	1.14707	0.0263887
ENSSSCG00000038417	1.25951	0.0263887
ENSSSCG00000007228	2.5819	0.0267327
ENSSSCG00000040888	1.91406	0.0301349
ENSSSCG00000039221	-2.77268	0.0304894
ENSSSCG00000005643	-1.58238	0.0308337
ENSSSCG00000013115	1.53628	0.0308337
ENSSSCG00000034607	-2.69473	0.0308337
ENSSSCG00000006059	1.10547	0.0311645
ENSSSCG00000023993	-1.53338	0.0315209
ENSSSCG00000022864	1.50321	0.0327317
ENSSSCG00000013444	-1.34786	0.032955
ENSSSCG00000006646	-0.993796	0.032955
ENSSSCG00000032550	-2.81229	0.0358534
ENSSSCG00000015327	2.33083	0.0379863
ENSSSCG00000010756	-1.90508	0.0381983
ENSSSCG00000025260	-1.68769	0.0391599
ENSSSCG00000032437	2.09994	0.040436
ENSSSCG00000017818	2.08127	0.0408705
ENSSSCG00000031949	2.27618	0.042247
ENSSSCG00000023728	-1.83165	0.042247
ENSSSCG00000031432	-1.0767	0.0431611
ENSSSCG00000024655	1.33174	0.0431611
ENSSSCG00000011245	-2.48042	0.0447012
ENSSSCG00000031616	2.13381	0.0447012
ENSSSCG00000030423	1.61825	0.0464235
ENSSSCG00000004166	1.48932	0.0465999
ENSSSCG00000015399	-2.60291	0.0506953
ENSSSCG00000009045	-2.51686	0.0507611
ENSSSCG00000029668	-1.06506	0.0507611
ENSSSCG00000004765	1.13601	0.051775
ENSSSCG00000003700	-2.2964	0.051775
ENSSSCG00000031115	-1.20112	0.051775
ENSSSCG00000014219	-1.69874	0.051775
ENSSSCG00000012440	-2.6158	0.051775
ENSSSCG00000001780	-1.48535	0.0544501
ENSSSCG00000009290	2.07528	0.0548525
ENSSSCG00000008638	-1.21194	0.0551742
ENSSSCG00000009479	-1.21934	0.0556405
ENSSSCG00000005380	-1.21095	0.0563092
ENSSSCG00000004123	-2.56565	0.057672
ENSSSCG00000015315	1.05862	0.0578056
ENSSSCG00000002472	0.782355	0.0578056
ENSSSCG00000004757	-2.62105	0.0584458
ENSSSCG00000016174	-2.50864	0.0584458
ENSSSCG00000023307	1.09817	0.0584458
ENSSSCG00000003914	-0.934523	0.0607415
ENSSSCG00000040648	1.37423	0.0607415
ENSSSCG00000032067	0.812971	0.0610373
ENSSSCG00000006954	1.56668	0.0643449
ENSSSCG00000014136	-1.38157	0.0658545
ENSSSCG00000015878	-1.71384	0.0687776
ENSSSCG00000006096	0.793973	0.0715806
ENSSSCG00000004225	-2.4831	0.0745408
ENSSSCG00000033532	2.44673	0.0745408
ENSSSCG00000038132	-0.960387	0.0745408
ENSSSCG00000007681	1.90012	0.0745408
ENSSSCG00000000694	0.98824	0.0745408
ENSSSCG00000030548	2.47572	0.0758281
ENSSSCG00000038714	1.10975	0.0759121
ENSSSCG00000015307	-2.46472	0.0774646
ENSSSCG00000002127	0.809162	0.0774646
ENSSSCG00000002963	1.2368	0.0784343
ENSSSCG00000006866	1.39666	0.0804301
ENSSSCG00000029458	-2.31456	0.0804301
ENSSSCG00000017817	-2.43478	0.0804301
ENSSSCG00000006930	-0.988877	0.0818126
ENSSSCG00000001475	2.20898	0.0818126
ENSSSCG00000013839	1.28205	0.0822991
ENSSSCG00000012489	1.76221	0.0822991
ENSSSCG00000040010	-0.763459	0.0822991
ENSSSCG00000002404	1.78481	0.0822991
ENSSSCG00000000766	1.18514	0.0822991
ENSSSCG00000036852	0.997623	0.0822991
ENSSSCG00000011615	1.25878	0.0826804
ENSSSCG00000000469	1.56617	0.0826804
ENSSSCG00000017082	-1.57662	0.0827618
ENSSSCG00000036855	1.22678	0.083394
ENSSSCG00000038500	1.39805	0.083394
ENSSSCG00000004750	1.56098	0.0836893
ENSSSCG00000024257	1.50392	0.0836893
ENSSSCG00000016118	-2.35681	0.0836893
ENSSSCG00000015112	-1.19609	0.0836893
ENSSSCG00000008573	1.19952	0.0836893
ENSSSCG00000006070	1.97461	0.0836893
ENSSSCG00000006385	1.234	0.0836893
ENSSSCG00000029509	2.45419	0.0864482
ENSSSCG00000028865	1.06216	0.0864482
ENSSSCG00000011630	-1.96504	0.0903671
ENSSSCG00000023377	1.04328	0.0903671
ENSSSCG00000015545	-2.17189	0.0903671
ENSSSCG00000027098	1.80206	0.0903671
ENSSSCG00000006089	1.56727	0.0903671
ENSSSCG00000006199	-2.38148	0.0903671
ENSSSCG00000027457	-0.948468	0.0903671
ENSSSCG00000021354	1.12836	0.0903671
ENSSSCG00000005971	2.17911	0.0904697
ENSSSCG00000031106	1.19286	0.0912209
ENSSSCG00000034131	1.74936	0.0912209
ENSSSCG00000011501	1.17367	0.0915875
ENSSSCG00000002755	1.48253	0.0915875
ENSSSCG00000010156	1.4516	0.0915875
ENSSSCG00000016331	1.58482	0.0915875
ENSSSCG00000033854	1.00497	0.0915875
ENSSSCG00000017273	-2.35665	0.0915875
ENSSSCG00000021472	0.959323	0.0957338
ENSSSCG00000027686	1.21036	0.0959942
ENSSSCG00000023272	1.24625	0.0959942
ENSSSCG00000034105	-1.31811	0.0959942
ENSSSCG00000013736	-1.10686	0.0960622
ENSSSCG00000039045	1.25494	0.0960622
ENSSSCG00000028504	1.32431	0.0960622
ENSSSCG00000021205	-1.82175	0.0960622
ENSSSCG00000029944	-1.36034	0.0960622
ENSSSCG00000029034	0.72698	0.0963733
ENSSSCG00000032407	-2.14803	0.0963733
ENSSSCG00000008072	-2.32481	0.0963733
ENSSSCG00000030119	0.831549	0.0963733
ENSSSCG00000000169	2.26643	0.0963733
ENSSSCG00000017525	-1.5302	0.0967383
ENSSSCG00000012944	1.41426	0.0978604
ENSSSCG00000013742	1.24314	0.0978604
ENSSSCG00000001700	-1.00081	0.0978604
ENSSSCG00000023269	1.62546	0.0990193
ENSSSCG00000003489	-2.3129	0.10047
ENSSSCG00000000189	1.51849	0.100589
ENSSSCG00000031866	-2.26174	0.102225
ENSSSCG00000005305	-1.98558	0.102354
